# Supplementary material
Source: publisher site journal article supplement (https://www.e-cmh.org/upload/media/cmh-2022-0330-Supplementary-8.pdf)
Supplement: Supplementary file 1 [file cmh-2022-0330-Supplementary-8.pdf]

A. Liver biopsy-based outcomes

(a) Fibrosis stage (9 studies)

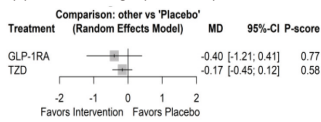

(a\*) Fibrosis stage (5 studies)

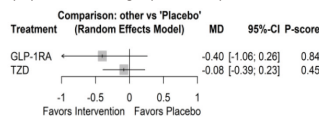

B. Non-invasive technique-based outcomes

(a) Liver fat contents by <sup>1</sup>H-MRS (5 studies)

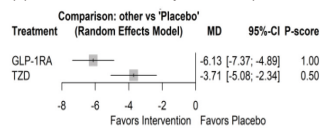

(a\*) Liver fat contents by <sup>1</sup>H-MRS (4 studies)

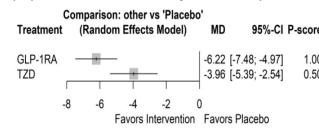

C. Biological and anthropometric outcomes

(a) ALT (19 studies)

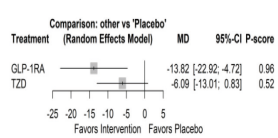

(a\*) ALT (12 studies)

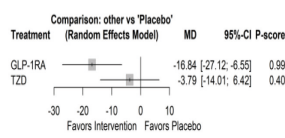

(b) AST (18 studies)

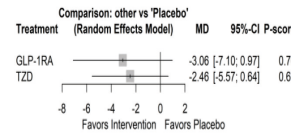

(b\*) AST (12 studies)

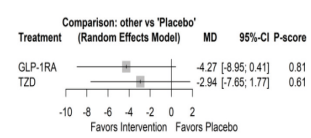

(c) HbA1c (17 studies)

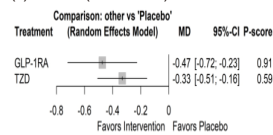

(c\*) HbA1c (12 studies)

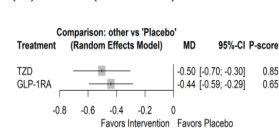

(d) FPG (23 studies)

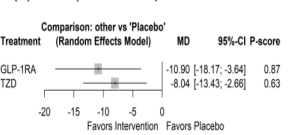

(d\*) FPG (16 studies)

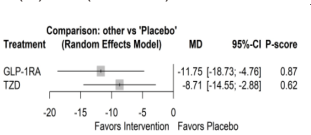

(e) HOMA-IR (12 studies)

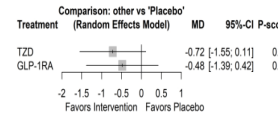

(e\*) HOMA-IR (7 studies)

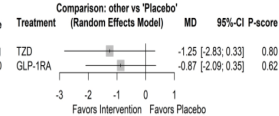

(f) T-Chol (16 studies)

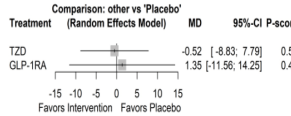

(f\*) T-Chol (13 studies)

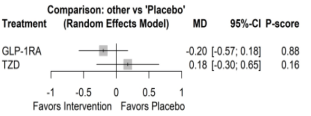

(g) LDL-C (15 studies)

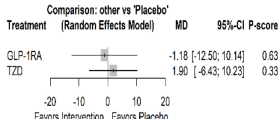

(g\*) LDL-C (13 studies)

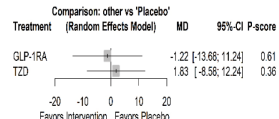

(h) TG (17 studies)

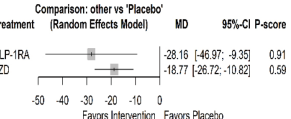

(h\*) TG (14 studies)

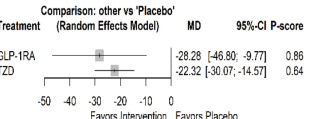

(i) BMI (22 studies)

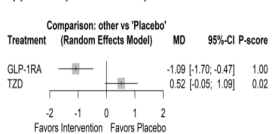

(i\*) BMI (15 studies)

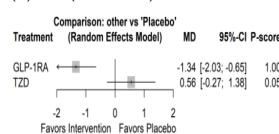

(j) WC (11 studies)

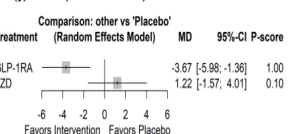

(j\*) WC (7 studies)

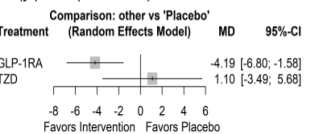

**Supplementary Material 8.** Sensitivity analysis. Sensitivity analysis was conducted after excluding six articles with a high risk for bias.

(A) Forest plots of the original and sensitivity analyses (\*). ALT, alanine aminotransferase; AST, aspartate aminotransferase; BMI, body mass index; FPG, fasting plasma glucose; GLP-1RA, glucagon-like peptide-1 receptor agonist; <sup>1</sup>H-MRS, proton magnetic resonance spectroscopy; HOMA-IR, homeostasis model assessment of insulin resistance; LDL-C, low-density lipoprotein-cholesterol; MD, mean difference; T-Chol, total cholesterol; TG, triglyceride; TZD, thiazolidinedione; WC, waist circumference. Sensitivity analysis was not performed in some outcomes because of the small number of studies remaining (NAS), and there were no studies with a high risk of bias (NASH resolution, liver fat contents by CAP). All sensitivity analysis results showed a low possibility of heterogeneity, inconsistency, and publication bias.

**Supplementary Material 8.** Continued

| Network meta estimates                   | Original                | Sensitivity             |
|------------------------------------------|-------------------------|-------------------------|
| Fibrosis stage                           | 9 studies               | 5 studies               |
| GLP-1RA vs. placebo                      | -0.40 (-1.21; 0.41)     | -0.40 (-1.06; 0.26)     |
| TZDs vs. placebo                         | -0.17 (-0.45; 0.12)     | -0.08 (-0.39; 0.23)     |
| GLP-1RA vs. TZDs                         | -0.23 (-1.09; 0.62)     | -0.32 (-1.05; 0.41)     |
| Liver fat contents by <sup>1</sup> H-MRS | 5 studies               | 4 studies               |
| GLP-1RA vs. placebo                      | -6.13 (-7.37; -4.89)*   | -6.22 (-7.48; -4.97)*   |
| TZDs vs. placebo                         | -3.71 (-5.08; -2.34)*   | -3.96 (-5.39; -2.54)*   |
| GLP-1RA vs. TZDs                         | -2.42 (-3.84; -1.00)*   | -2.26 (-3.70; -0.82)*   |
| ALT                                      | 19 studies              | 12 studies              |
| GLP-1RA vs. placebo                      | -13.82 (-22.92; -4.72)* | -16.84 (-27.12; -6.55)* |
| TZDs vs. placebo                         | -6.09 (-13.01; 0.83)    | -3.79 (-14.01; 6.42)    |
| GLP-1RA vs. TZDs                         | -7.73 (-18.61; 3.14)    | -13.04 (-26.46; 0.37)   |
| AST                                      | 18 studies              | 12 studies              |
| GLP-1RA vs. placebo                      | -3.06 (-7.10; 0.97)     | -4.27 (-8.95; 0.41)     |
| TZDs vs. placebo                         | -2.46 (-5.57; 0.64)     | -2.94 (-7.65; 1.77)     |
| GLP-1RA vs. TZDs                         | -0.6 (-5.55; 4.35)      | -1.33 (-7.67; 5.01)     |
| HbA1c                                    | 17 studies              | 12 studies              |
| GLP-1RA vs. placebo                      | -0.47 (-0.72; -0.23)*   | -0.44 (-0.59; -0.29)*   |
| TZDs vs. placebo                         | -0.33 (-0.51; -0.16)*   | -0.50 (-0.70; -0.30)*   |
| GLP-1RA vs. TZDs                         | -0.14 (-0.44; 0.15)     | 0.06 (-0.18; 0.31)      |
| FPG                                      | 23 studies              | 16 studies              |
| GLP-1RA vs. placebo                      | -10.9 (-18.17; -3.64)*  | -11.75 (-18.73; -4.76)* |
| TZDs vs. placebo                         | -8.04 (-13.43; -2.66)*  | -8.71 (-14.55; -2.88)*  |
| GLP-1RA vs. TZDs                         | -2.86 (-11.72; 6.00)    | -3.04 (-11.92; 5.85)    |
| HOMA-IR                                  | 12 studies              | 7 studies               |
| GLP-1RA vs. placebo                      | -0.48 (-1.39; 0.42)     | -0.87 (-2.09; 0.35)     |
| TZDs vs. placebo                         | -0.72 (-1.55; 0.11)     | -1.25 (-2.83; 0.33)     |
| GLP-1RA vs. TZDs                         | 0.24 (-0.89; 1.37)      | 0.38 (-1.34; 2.11)      |
| T-Chol                                   | 16 studies              | 13 studies              |
| GLP-1RA vs. placebo                      | 1.35 (-11.56; 14.25)    | -0.20 (-0.57; 0.18)     |
| TZDs vs. placebo                         | -0.52 (-8.83; 7.79)     | 0.18 (-0.30; 0.65)      |
| GLP-1RA vs. TZDs                         | 1.87 (-12.90; 16.64)    | -0.37 (-0.92; 0.18)     |
| LDL-C                                    | 15 studies              | 13 studies              |
| GLP-1RA vs. placebo                      | -1.18 (-12.50; 10.14)   | -1.22 (-13.68; 11.24)   |
| TZDs vs. placebo                         | 1.90 (-6.43; 10.23)     | 1.83 (-8.58; 12.24)     |
| GLP-1RA vs. TZDs                         | -3.08 (-16.57; 10.41)   | -3.05 (-18.47; 12.36)   |
| TG                                       | 17 studies              | 14 studies              |
| GLP-1RA vs. placebo                      | -28.16 (-46.97; -9.35)* | -28.28 (-46.80; -9.77)* |

**Supplementary Material 8.** Continued

| Network meta estimates | Original                 | Sensitivity              |
|------------------------|--------------------------|--------------------------|
| TZDs vs. placebo       | -18.77 (-26.72; -10.82)* | -22.32 (-30.07; -14.57)* |
| GLP-1RA vs. TZDs       | -9.39 (-29.72; 10.94)    | -5.96 (-25.96; 14.03)    |
| <b>BMI</b>             | 22 studies               | 15 studies               |
| GLP-1RA vs. placebo    | -1.09 (-1.70; -0.47)*    | -1.34 (-2.03; -0.65)*    |
| TZDs vs. placebo       | 0.52 (-0.05; 1.09)       | 0.56 (-0.27; 1.38)       |
| GLP-1RA vs. TZDs       | -1.6 (-2.41; -0.80)*     | -1.90 (-2.92; -0.88)*    |
| <b>WC</b>              | 11 studies               | 7 studies                |
| GLP-1RA vs. placebo    | -3.67 (-5.98; -1.36)*    | -4.19 (-6.80; -1.58)*    |
| TZDs vs. placebo       | 1.22 (-1.57; 4.01)       | 1.10 (-3.49; 5.68)       |
| GLP-1RA vs. TZDs       | -4.89 (-8.17; -1.61)*    | -5.28 (-9.77; -0.80)*    |

(B) A comparison table of original and sensitivity analyses. ALT, alanine aminotransferase; AST, aspartate aminotransferase; BMI, body mass index; FPG, fasting plasma glucose; GLP-1RA, glucagon-like peptide-1 receptor agonist; <sup>1</sup>H-MRS, proton magnetic resonance spectroscopy; HOMA-IR, homeostasis model assessment of insulin resistance; LDL-C, low-density lipoprotein-cholesterol; T-Chol, total cholesterol; TG, triglyceride; TZD, thiazolidinedione; WC, waist circumference. \*Asterisk indicates statistically significant data.
